# Supplementary material
Source: publisher site journal article supplement (https://www.dovepress.com/article/452272)
Supplement: Supplementary file 1 [file get_supplementary_file.php]

# ALLELIC DISCRIMINATION PLOT

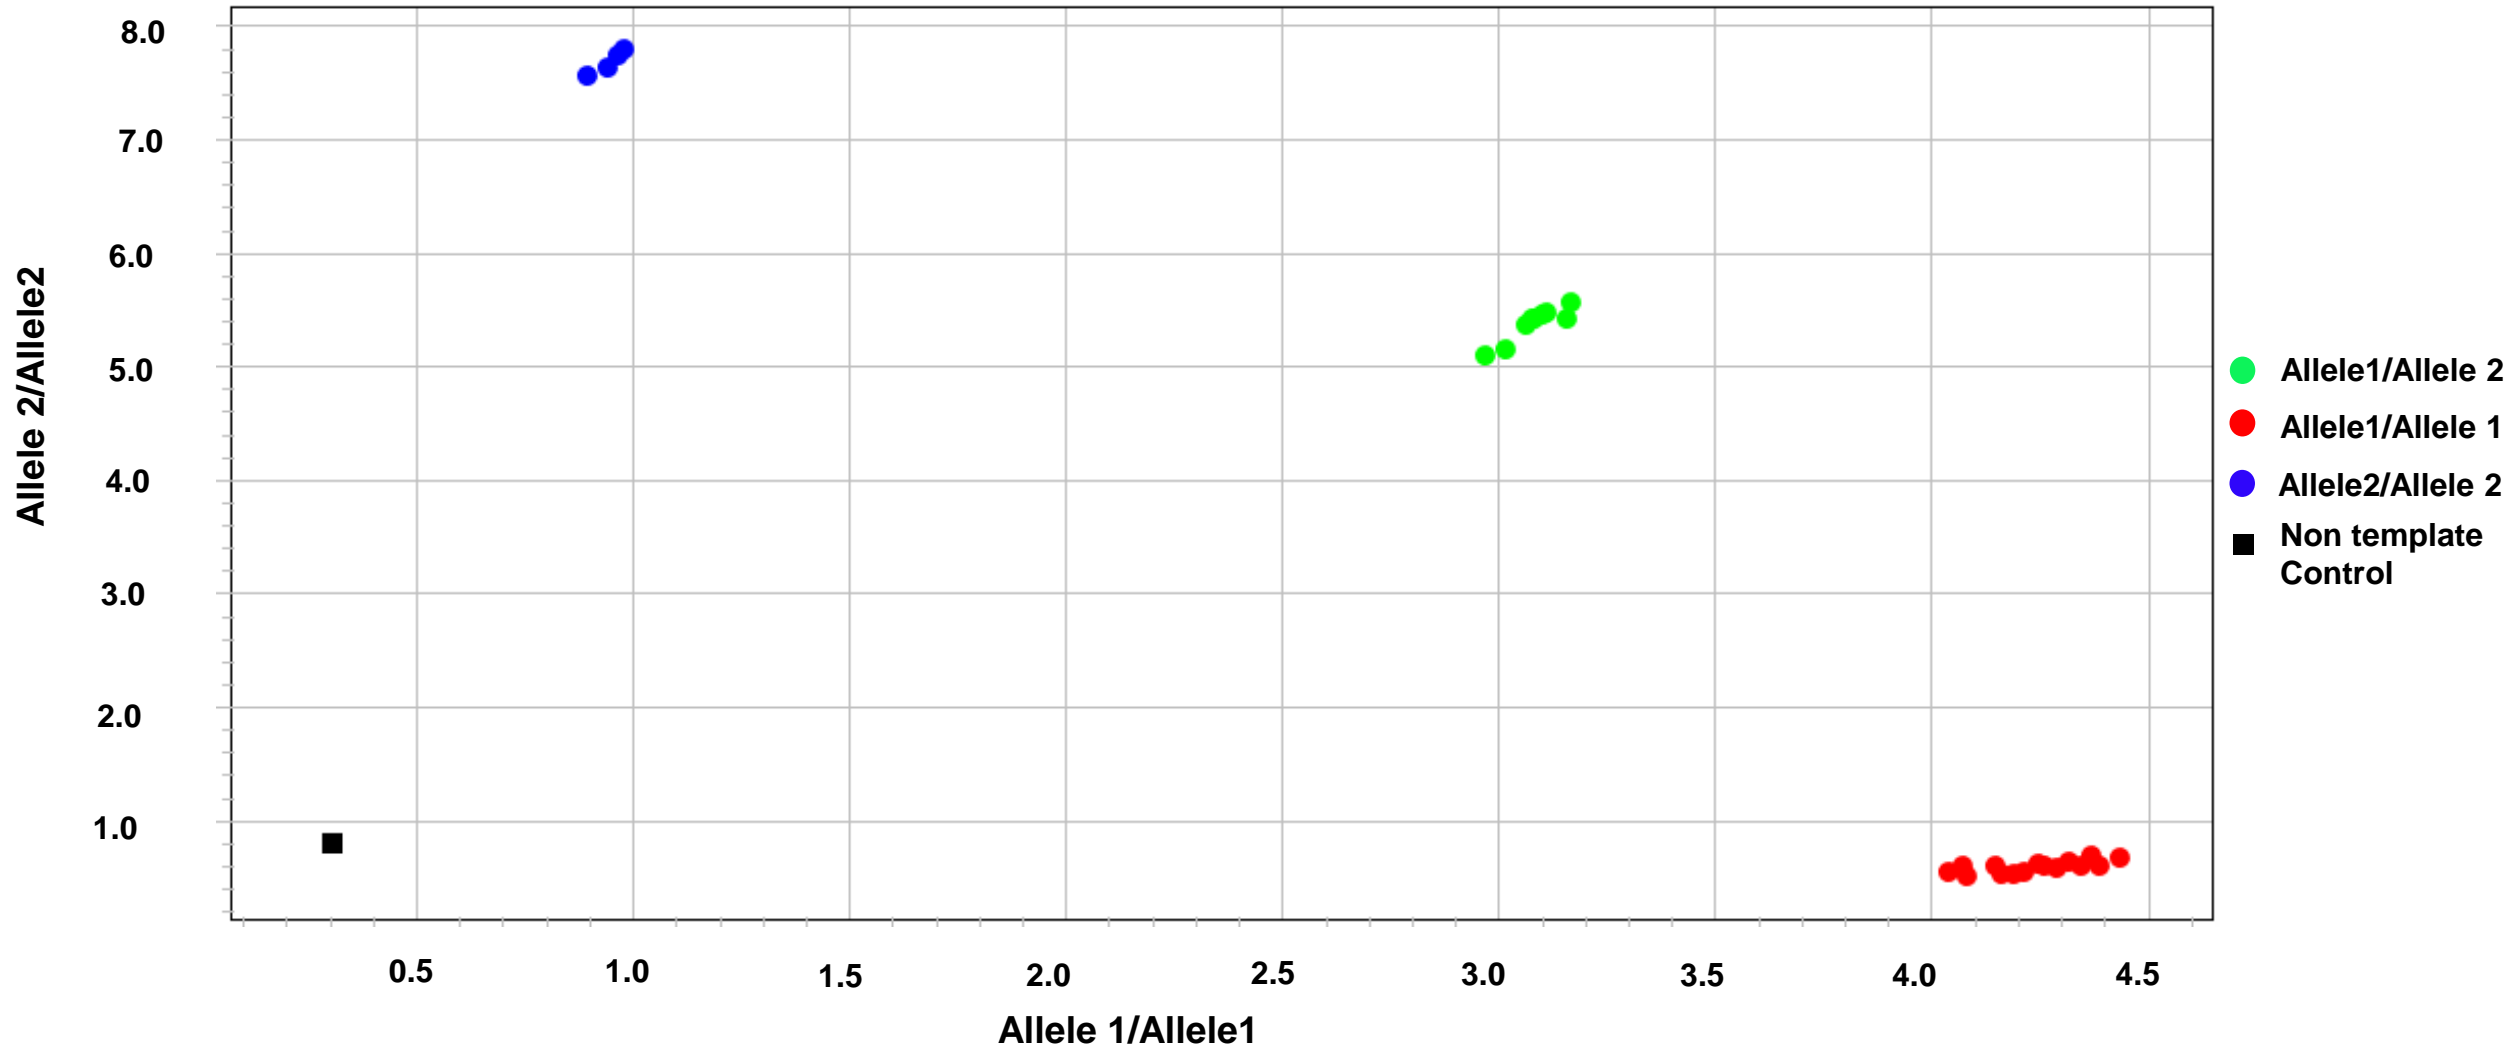

**Supplementary Figure S1: The Allelic Discriminatory plot of different genotypes from qRT-PCR analysis using Taqman Assay**
